# Supplementary material for: Livestock manure improved antibiotic resistance gene removal during co-treatment of domestic wastewater in an anaerobic membrane bioreactor
Source: Royal Society of Chemistry journal article supplement (doi:10.1039/d0ew00387e), 2020-01-01

† **Electronic supplementary information (ESI)**

**Livestock manure improved antibiotic resistance gene removal during co-treatment of domestic wastewater in an anaerobic membrane bioreactor**

Esther Lou<sup>a</sup>, Moustapha Harb<sup>b</sup>, Adam L. Smith<sup>c</sup>, and Lauren B. Stadler<sup>a,\*</sup>

<sup>a</sup> Department of Civil and Environmental Engineering, Rice University, 6100 Main Street, MS 519, Houston, TX 77005

<sup>b</sup> Department of Civil and Environmental Engineering, Lebanese American University, 309 Bassil Building, Byblos, Lebanon 2038-1401

<sup>c</sup> Astani Department of Civil and Environmental Engineering, University of Southern California, 3620 South Vermont Avenue, Los Angeles, CA 90089, USA

\*Corresponding author: Lauren B. Stadler, Department of Civil and Environmental Engineering, Rice University, 6100 Main Street, MS 519, Houston, TX 77005

E-mail address: Esther Lou ([esther.lou@rice.edu](mailto:esther.lou@rice.edu)), Lauren B. Stadler ([lauren.stadler@rice.edu](mailto:lauren.stadler@rice.edu))

# 1 **1. Methods**

## 2 **1.1 AnMBR set-up and monitoring**

### 3 **1.1.1 AnMBR configuration and operational parameters**

4       The AnMBR with a liquid volume of 4.5 L (Chemglass Life Science, Vineland, NJ)  
5 was operated continuously. The hydraulic retention time (HRT) of the AnMBR was  
6 maintained at 19 h by controlling the membrane permeate flux. Biomass was only  
7 removed from the AnMBR for sampling purposes, resulting in a solids retention time  
8 (SRT) of >300 days. Headspace gas was recirculated using a diaphragm pump (KNF  
9 Neuberger, Trenton, NJ), and then distributed below each membrane through a  
10 horizontally placed sparging tube designed for fouling control. The gas flow rate passing  
11 through each sparging tube was controlled via a gas flow meter to maintain the TMPs of  
12 all three membranes similar to one another and below 5.5 kPa. The TMP across each  
13 membrane was measured using a pressure transducer (Omega Engineering, Stamford, CT).  
14 The headspace pressure was monitored using another pressure transducer and the biogas  
15 was collected using a Tedlar sampling bag attached to the head plate (Restek, Bellefonte,  
16 PA) after a check valve. The influent was stored in a 4 °C refrigerator and pumped into the  
17 reactor through a peristaltic pump (Cole-Parmer, Vernon Hills, IL). The effluent was  
18 continuously withdrawn with another peristaltic pump with a backwash ratio of 10%. The  
19 liquid level was monitored by a sensor switch. The AnMBR was connected to a computer,  
20 which operated a control program and LabVIEW (National Instruments, Austin, TX) data  
21 acquisition software. The control program was responsible for operation of all pumps,  
22 biogas recirculation, and mixing. The LabVIEW 2017 software (Student Edition)

23 continuously monitored and recorded temperature, TMPs, feed flow rate, and head space  
24 pressure.

### 25 **1.1.2 Operation stages and feeding preparation**

26 After inoculation, the AnMBR fed treating domestic wastewater for 3 weeks until it  
27 reached steady-state operation (defined as headspace biogas methane content > 60% and  
28 effluent COD < 50 mg/L treating domestic wastewater). Baseline stage commenced 121  
29 days after the AnMBR was started up. The duration of each operational stage was: 16 days  
30 (Baseline), 20 days (Stage 1), 15 days (Stage 2), 17 days (Stage 3), and 18 days (Stage 4).  
31 In each operational stage, samples were collected approximately every 2 HRTs. The  
32 influent for Stages 1 - 4 was prepared by defrosting frozen manure slurry in the fridge,  
33 homogenizing the manure slurry with a Waring Blender, weighing the slurry, and mixing it  
34 with freshly collected domestic wastewater. After adding the manure to the wastewater, the  
35 influent was then passed through a 1 mm sieve to remove large solids and prevent influent  
36 channel clogging.

37 Biogas was collected in Tedlar sampling bags with valve and septum fittings  
38 (Restek, PA) through a built-in port to the reactor headspace. The volume of biogas  
39 produced was measured using a 100 mL BD Slip Tip syringe connected to the gas bag  
40 valve after the gas bag had been inflated for approximately a day. A one-way check valve  
41 was place between the headspace and the sampling bag to prevent leaking during sampling.  
42 For quantitative analysis of the biogas composition, biogas was sampled using a gas-tight  
43 glass syringe with lock (Hamilton) and assessed by TRACE™ 1300 Gas Chromatograph  
44 (ThermoFisher Scientific) with pulsed discharge detector (GC-PDD). The standard curve  
45 for methane quantification was prepared using analytical grade methane (Airgas).

46 Chemical oxygen demand (COD) was measured in accordance with USEPA  
47 Method 410.4 using Genesys 10S UV-Vis Spectrophotometer (Thermo Scientific) and  
48 COD vial kits (CHEMetrics Inc.). Volatile fatty acids (acetate, propionate, formate and  
49 valerate), sulfate and nitrate were measured by ion chromatography on an ICS 2100  
50 (Thermo Fisher Scientific, Waltham, MA) using methods described previously.<sup>1</sup>

## 51 **1.2 DNA extraction with internal standards**

52 Internal standards of cell-associated DNA (caDNA) and cell-free DNA (cfDNA)  
53 were spiked into samples prior to filtration and DNA extraction to correct for losses during  
54 sample processing and DNA extraction. For the caDNA internal standard, we spiked in  
55 *Escherichia. coli* DH10 $\beta$  containing an engineered plasmid. The plasmid, *pReporter\_8*  
56 (RRID: Addgene\_60568), is a low-copy plasmid that was previously modified by knocking  
57 out the gene encoding green fluorescence reporter (GFP) and replacing it with the methyl-  
58 halide transferase (MHT) gene found in *Batis Maritima*.<sup>2</sup> Prior to spiking the samples with  
59 the caDNA internal standard, *E. coli* DH10 $\beta$  was grown up on a Luria broth plate  
60 containing 34  $\mu\text{g}/\text{mL}$  chloramphenicol at 37  $^{\circ}\text{C}$  overnight. A single colony was transferred  
61 to a tube containing 2 mL Luria broth with 34  $\mu\text{g}/\text{mL}$  chloramphenicol followed by  
62 incubation at 200 rpm under 37  $^{\circ}\text{C}$ . After 12 h of incubation, 500  $\mu\text{L}$  liquid culture was  
63 added to influent and effluent samples, respectively, right before sample filtration. qPCR  
64 was performed on the samples spiked with internal standards to determine the copy number  
65 of the recovered caDNA internal standard in the final DNA extracts ( $C_i$  in equation 1) and  
66 the copy number of target genes in the final DNA extracts ( $C_s$  in equation 1). In addition, a  
67 500  $\mu\text{L}$  aliquot of liquid culture from the same culture tube of internal standard was used in

68 an independent DNA extraction to determine the copy number of caDNA internal standard  
69 that was spiked into the sample ( $C_0$  in equation 1).

70 Before DNA extraction, membranes were cut to small pieces and transferred to  
71 Lysing Matrix E tubes (MP Biomedicals). All Lysing Matrix E tubes (containing either  
72 influent sample, effluent sample or the caDNA internal standards) underwent bead-beating  
73 with the maximum intensity for 2 minutes (BioSpec Products, Mini-bead beater 24, 115 V).  
74 After bead-beating, DNA extraction was performed using FastDNA SPIN Kit for Soil (MP  
75 Biomedicals) and each sample was eluted to obtain a final volume of 100  $\mu$ L of DNA  
76 extract.

77 Plasmid pUC19 with an inserted sequence for qPCR was used as the internal  
78 standard for cell-free ARG calibration. The insertion is a 183 bp fragment on *ARHGAP11B*  
79 gene, a human-associated gene that is specific to the brain neocortex.<sup>3</sup> The DNA fragment  
80 was synthesized (gBlocks, Integrated DNA technology Inc.) and cloned into pMini T2.0  
81 vector and then transferred to NEB 10- $\beta$  Competent *E. coli* using the PCR Cloning Kit  
82 (New England BioLabs Inc., MA). Plasmids were extracted using ZR Plasmid Miniprep kit  
83 (ZYMO Research, CA). Approximately  $1 \times 10^8$  copies of synthesized pMini T2.0 plasmids  
84 were added to each effluent sample prior to sample filtration and DNA extraction. The  
85 quality of all DNA extracts was tested using 1000 UV-Vis Spectrophotometer  
86 (ThermoFisher Scientific, MA). Qubit 3.0 fluorometer and Qubit dsDNA BR Assay Kit  
87 (Invitrogen, CA) were applied for DNA quantification.

### 88 **1.3 Quantifications of target genes and internal standards in real time qPCR**

89 For all target genes (*sul1*, *sul2*, *tet(W)*, *tet(O)*, *ampC*, *ermB*, *ermF*, *blaOXA-1*, *blaNDM1*,  
90 *tp614*, *intI1*) as well as caARG and cfARG internal standards, 10.5  $\mu$ L qPCR reactions

91 were performed on MicroAmp Fast Optical 96-Well Reaction Plate (0.1 mL, Applied  
92 Biosystems) using the QuantStudio 3.0 Real-Time PCR Systems (Applied Biosystems, CA).  
93 The standard amplification protocol consisted of an initial denaturation step at 95 °C for 2  
94 min, followed by 40 amplification cycles at 95 °C for 5 s, annealing temperature for 12 s,  
95 and 72 °C for 16 s and the melting steps (at 95 °C for 15 s, 60 °C for 1 min, at 95 °C for 15  
96 s). qPCR standards were prepared by inserting the target genes into pMiniT 2.0 vector and  
97 transformed to NEB 10-β Competent *E. coli* using the NEB PCR Cloning Kit (New  
98 England Biolabs, MA). The inserted target genes, before cloning and transformation, were  
99 purified and sequenced PCR products of the AnMBR sludge. The PCR assays were  
100 conducted using the exact same primers and conditions as the qPCR assays in this study. In  
101 addition, PCR products were analyzed on 1% agarose gel electrophoresis to verify the  
102 correct amplicon size and the negative presence of non-specific products. The expected  
103 PCR products were then cut off from the gel, purified by a Qiagen QIAquick Gel  
104 Extraction kit, and sequenced by Sanger method (Genewiz, Inc., TX) to confirm the  
105 sequences. After cloning and transformation, transformed *E. coli* were selected for on AMP  
106 selection plates. Grown single colony was picked and cultured overnight again in AMP  
107 selection LB overnight. Plasmid extraction was then conducted to acquire plasmids from  
108 the cell culture using a ZR Plasmid Miniprep kit (ZYMO Research, CA). Extracted  
109 plasmids were then diluted ten-fold to generate standard curve for each qPCR assay. For all  
110 qPCR assays performed in this study, three technical replicates were conducted for each  
111 biological replicate, melt curves were checked for all reactions, and 3 NTCs were included  
112 on each plate. qPCR reaction efficiencies and limits of quantification (lowest standard  
113 concentration; LOQ) for each assay are reported in ESI Table S5.

## 114 **2. Results**

### 115 **2.1 Performance**

116 The performance of the AnMBR across all operational stages is shown in Figure A2.  
117 In addition, ion-chromatography results showed trace concentration of formic acid ( $2.21 \pm$   
118  $0.18$  mg/L) and acetic acid ( $2.72 \pm 0.16$  mg/L) in the effluent during Baseline operation.  
119 With the addition of manure starting from Stage 1, effluent COD gradually increased (Fig.  
120 S1). Interestingly, in the effluent of Baseline operation, propionate was not detected;  
121 however, from Stage 1 through 4, propionate started to accumulate in the effluent  
122 significantly due to the addition of manure ( $p < 0.01$ ). Previous studies have shown  
123 propionate is a key indicator denoting process imbalances in anaerobic digesters treating  
124 complex organic waste,<sup>4,5</sup> which is consistent with the input of manure starting from Stage  
125 1. VFA concentrations are listed in ESI† Table S2. Solids concentrations are listed in ESI†  
126 Table S1.

### 127 **2.2 The absolute and relative concentrations of target genes in influent and effluent** 128 **across stages**

129 The DNA recoveries are shown in Table S6. cfDNA recovery efficiencies for all  
130 stages averaged approximately 30% and were consistent across stages. While the average  
131 recovery efficiency was lower than the  $>90\%$  recovery reported by the group that  
132 developed the method,<sup>6</sup> the discrepancy is likely due to differences in experimental steps  
133 used during cfDNA extraction. Specifically, Wang et al. only attempted to recover cfDNA  
134 without also recovering caDNA. In contrast, we first processed the samples to collect  
135 caDNA using filtration, and then used the filtrate to capture the cfDNA using absorption-  
136 elution. As a result, a fraction of cfDNA may have been lost during filtration. Our reported

137 recoveries were nevertheless higher than other widely-applied methods for cfDNA such as  
138 alcohol precipitation and CTAB-based extraction and commercial kits (recovery  
139 efficiencies typically <10%).<sup>7-9</sup> In addition, the recoveries in this study were consistent  
140 across all stages (Table. S6), reflecting the reproducibility of the applied cfDNA extraction  
141 protocol. As the goal of using internal standards for tracking recoveries is to calibrate target  
142 gene abundance data, the reproducibility of DNA recovery is as important, if not more so,  
143 than a high recovery value.

### 144 **2.3 Correlation analysis of effluent cell-associated and cell-free ARGs**

145 Correlation analysis of effluent caARGs revealed significant associations between  
146 different gene types. Effluent cell-associated *intI1* concentrations were significantly  
147 positively correlated with *sul1* concentrations across all stages of treatment (Pearsons,  $r =$   
148  $0.97$ ,  $p < 0.01$ ). This suggests *sul1* may be associated with a Class I integron cassette and  
149 co-located on the same plasmids, which was consistent with previous studies on ARG fate  
150 in different environments.<sup>10-12</sup> The correlation between *intI1* and *sul1* is not surprising  
151 because they are both associated with Class I integrons.<sup>13,14</sup> We also observed that the cell-  
152 associated concentrations of *ampC* were positively correlated with *rpoB* concentrations  
153 (Pearsons  $r = 0.91$ ,  $p < 0.01$ ) indicating *ampC* genes are likely cell-associated, which is  
154 consistent with the fact that *ampC* genes are frequently detected on chromosomes.<sup>15,16</sup>

155 We observed that *intI1* only correlated with one other ARG (*sul1*) in the cell-  
156 associated DNA fraction, but strongly positively correlated with multiple ARGs in the cell-  
157 free fraction: *sul2* (Pearsons,  $r = 0.58$ ,  $p < 0.01$ ), *ampC* (Pearsons,  $r = 0.63$ ,  $p < 0.01$ ) and  
158 *ermB* (Pearsons,  $r = 0.89$ ,  $p < 0.01$ ). These results are in contrast to some previous studies  
159 on fate of ARGs in wastewater environments that reported insignificant associations



160 between *intI1* and *sul2*, whereas they observed significant positive associations between  
161 *intI1* and *sul1*.<sup>17-20</sup> However, in soil and manure environments, significant positive  
162 associations between *intI1* and *sul2* have been frequently observed.<sup>11,21-26</sup> *IntI1* has drawn  
163 attention in many research studies because it is a proxy for anthropogenic pollution  
164 including antibiotic resistance dissemination.<sup>27</sup> However, it is challenging to compare our  
165 data to these previous studies directly because neither did they explicitly distinguish the  
166 cfARGs from caARGs, nor even capture the cfARG fraction due to the methods they  
167 used.<sup>28-31</sup>

168         The concentrations of cell-free *blaOXA-1*, *tp614* and *blaNDM1* in the effluent  
169 increased consistently across all stages (t-test,  $p < 0.05$ ; Fig. 4B). The enrichment of *tp614*  
170 has also been reported in several wastewater treatment processes,<sup>32</sup> which underscores the  
171 challenge of removing it. The difficulty in removing *tp614* is noteworthy because its  
172 concentration has been found to positively correlate with persistent ARGs, particularly  
173 tetracycline and extended spectrum beta-lactamase (ESBL) ARGs.<sup>33</sup> We also observed a  
174 significant and positive correlation between *tp614* and *blaOXA-1* (Pearsons,  $r = 0.98$ ,  $p <$   
175  $0.01$ ), and *tp614* and *ermF* (Pearsons,  $r = 0.97$ ,  $p < 0.01$ ). The detailed correlation analysis  
176 data using Pearson's correlation analysis can be found in Tables S11 and S12.

177

178

179

180

181

182 **References**

183

184 1. Chen S, Smith AL. Methane-driven microbial fuel cells recover energy and mitigate  
185 dissolved methane emissions from anaerobic effluents. *Environ Sci Water Res*  
186 *Technol.* 2018,**4**,67–79.

187 2. Cheng HY, Masiello CA, Bennett GN, Silberg JJ. Volatile Gas Production by  
188 Methyl Halide Transferase: An in Situ Reporter of Microbial Gene Expression in  
189 Soil. *Environ Sci Technol.* 2016,**50**,8750–9.

190 3. Florio M, Albert M, Taverna E, Namba T, Brandl H, Lewitus E, et al. Human-  
191 specific gene ARHGAP11B promotes basal progenitor amplification and neocortex  
192 expansion. *Science* (80- ). 2015,.

193 4. Zitomer D, Maki J, Venkiteshwaran K, Bocher B. Relating Anaerobic Digestion  
194 Microbial Community and Process Function. *Microbiol Insights.* 2016,**8s2**,37.

195 5. Demirel B, Yenigün O. The effects of change in volatile fatty acid (vfa) composition  
196 on methanogenic upflow filter reactor (ufaf) performance. *Environ Technol (United*  
197 *Kingdom).* 2002,**23**,1179–87.

198 6. Wang DN, Liu L, Qiu ZG, Shen ZQ, Guo X, Yang D, et al. A new adsorption-  
199 elution technique for the concentration of aquatic extracellular antibiotic resistance  
200 genes from large volumes of water. *Water Res.* 2016,**92**,188–98.

201 7. Liang Z, Keeley A. Filtration recovery of extracellular DNA from environmental  
202 water samples. *Environ Sci Technol.* 2013,.

203 8. Eichmiller JJ, Miller LM, Sorensen PW. Optimizing techniques to capture and  
204 extract environmental DNA for detection and quantification of fish. *Mol Ecol Resour.*  
205 2016,**16**,56–68.

- 206 9. Li F, Peng Y, Fang W, Altermatt F, Xie Y, Yang J, et al. Application of  
207 Environmental DNA Metabarcoding for Predicting Anthropogenic Pollution in  
208 Rivers. *Environ Sci Technol*. 2018,acs.est.8b03869.
- 209 10. Zarei-baygi A, Harb M, Wang P, Stadler LB, Smith AL. Evaluating Antibiotic  
210 Resistance Gene Correlations with Antibiotic Exposure Conditions in Anaerobic  
211 Membrane Bioreactors. *Environ Sci Technol*. 2019,**53**,3599–609.
- 212 11. Duan M, Gu J, Wang X, Li Y, Zhang S, Yin Y, et al. Effects of genetically modified  
213 cotton stalks on antibiotic resistance genes, *intI1*, and *intI2* during pig manure  
214 composting. *Ecotoxicol Environ Saf*. 2018,**147**,637–42.
- 215 12. Xu Y, Guo C, Luo Y, Lv J, Zhang Y, Lin H, et al. Occurrence and distribution of  
216 antibiotics, antibiotic resistance genes in the urban rivers in Beijing, China. *Environ*  
217 *Pollut*. 2016,**213**,833–40.
- 218 13. Mazel D. Integrons: Agents of bacterial evolution. *Nat Rev Microbiol*. 2006,**4**,608–  
219 20.
- 220 14. Deng Y, Bao X, Ji L, Chen L, Liu J, Miao J, et al. Resistance integrons: class 1, 2  
221 and 3 integrons. *Ann Clin Microbiol Antimicrob*. 2015,**14**,45.
- 222 15. Bergstrom S, Olsson O, Normark S. Common evolutionary origin of chromosomal  
223 beta-lactamase genes in enterobacteria. *J Bacteriol*. 1982,**150**,528–34.
- 224 16. Mata C, Miró E, Alvarado A, Garcillán-Barcia MP, Toleman M, Walsh TR, et al.  
225 Plasmid typing and genetic context of AmpC  $\beta$ -lactamases in enterobacteriaceae  
226 lacking inducible chromosomal ampC genes: Findings from a Spanish hospital 1999-  
227 2007. *J Antimicrob Chemother*. 2012,**67**,115–22.
- 228 17. Lu J, Zhang Y, Wu J, Wang J, Cai Y. Fate of antibiotic resistance genes in reclaimed

- 229 water reuse system with integrated membrane process. *J Hazard Mater.*  
230 2020,**382**,121025.
- 231 18. Jang HM, Lee J, Choi S, Shin J, Kan E, Kim YM. Response of antibiotic and heavy  
232 metal resistance genes to two different temperature sequences in anaerobic digestion  
233 of waste activated sludge. *Bioresour Technol.* 2018,.
- 234 19. Ma L, Li AD, Yin X Le, Zhang T. The Prevalence of Integrons as the Carrier of  
235 Antibiotic Resistance Genes in Natural and Man-Made Environments. *Environ Sci*  
236 *Technol.* 2017,.
- 237 20. Li J, Cheng W, Xu L, Strong PJ, Chen H. Antibiotic-resistant genes and antibiotic-  
238 resistant bacteria in the effluent of urban residential areas, hospitals, and a municipal  
239 wastewater treatment plant system. *Environ Sci Pollut Res.* 2015,.
- 240 21. Sun W, Qian X, Gu J, Wang XJ, Duan ML. Mechanism and Effect of Temperature  
241 on Variations in Antibiotic Resistance Genes during Anaerobic Digestion of Dairy  
242 Manure. *Sci Rep.* 2016,**6**,1–9.
- 243 22. Liu P, Jia S, He X, Zhang X, Ye L. Different impacts of manure and chemical  
244 fertilizers on bacterial community structure and antibiotic resistance genes in arable  
245 soils. *Chemosphere.* 2017,**188**,455–64.
- 246 23. Guo X pan, Yang Y, Lu D pei, Niu Z shun, Feng J nan, Chen Y ru, et al. Biofilms as  
247 a sink for antibiotic resistance genes (ARGs) in the Yangtze Estuary. *Water Res.*  
248 2018,**129**,277–86.
- 249 24. Sun W, Gu J, Wang X, Qian X, Tuo X. Impacts of biochar on the environmental risk  
250 of antibiotic resistance genes and mobile genetic elements during anaerobic digestion  
251 of cattle farm wastewater. *Bioresour Technol.* 2018,**256**,342–9.

- 252 25. Zhao X, Wang J, Zhu L, Wang J. Field-based evidence for enrichment of antibiotic  
253 resistance genes and mobile genetic elements in manure-amended vegetable soils.  
254 *Sci Total Environ.* 2019,**654**,906–13.
- 255 26. Ma J, Gu J, Wang X, Peng H, Wang Q, Zhang R, et al. Effects of nano-zerovalent  
256 iron on antibiotic resistance genes during the anaerobic digestion of cattle manure.  
257 *Bioresour Technol.* 2019,**289**,121688.
- 258 27. Gillings MR, Gaze WH, Pruden A, Smalla K, Tiedje JM, Ku J. Using the class 1  
259 integron-integrase gene as a proxy for anthropogenic pollution. *ISME J.*  
260 2014,**9**,1269–79.
- 261 28. Zhang Y, Li H, Gu J, Qian X, Yin Y, Li Y, et al. Effects of adding different  
262 surfactants on antibiotic resistance genes and *intI1* during chicken manure  
263 composting. *Bioresour Technol.* 2016,**219**,545–51.
- 264 29. Xu Y, Xu J, Mao D, Luo Y. Effect of the selective pressure of sub-lethal level of  
265 heavy metals on the fate and distribution of ARGs in the catchment scale. *Environ*  
266 *Pollut.* 2017,**220**,900–8.
- 267 30. Sun M, Ye M, Wu J, Feng Y, Wan J, Tian D, et al. Positive relationship detected  
268 between soil bioaccessible organic pollutants and antibiotic resistance genes at dairy  
269 farms in Nanjing, Eastern China. *Environ Pollut.* 2015,**206**,421–8.
- 270 31. Yuan Q Bin, Zhai YF, Mao BY, Hu N. Antibiotic resistance genes and *intI1*  
271 prevalence in a swine wastewater treatment plant and correlation with metal  
272 resistance, bacterial community and wastewater parameters. *Ecotoxicol Environ Saf.*  
273 2018,**161**,251–9.
- 274 32. Yan W, Guo Y, Xiao Y, Wang S, Ding R, Jiang J, et al. The changes of bacterial

275 communities and antibiotic resistance genes in microbial fuel cells during long-term  
276 oxytetracycline processing. *Water Res.* 2018,**142**,105–14.

277 33. Jong MC, Su JQ, Bunce JT, Harwood CR, Snape JR, Zhu YG, et al. Co-optimization  
278 of sponge-core bioreactors for removing total nitrogen and antibiotic resistance  
279 genes from domestic wastewater. *Sci Total Environ.* 2018,**634**,1417–23.

280

281

282

283

284

285

286

287

288

289

290

291

292

293

294

295

296

297 **Table S1** Solids contents in the influent, effluent and the mixed liquor.

298 **Table S2** Volatile fatty acids (VFAs) concentrations in effluent across all operational stages.  
299

300 **Table S3** Internal standards for caARG and cfARG.

301 **Table S4** Primer sequences and qPCR conditions for all target genes.

302 **Table S5** qPCR reaction efficiencies and LOQs for each assay.

303 **Table S6** caDNA and cfDNA recoveries of all stages.

304 **Table S7** LRVs of genes across all stages.

305 **Table S8** Concentrations of target genes in the influent across all stages (copies/mL of  
306 influent).

307 **Table S9** Concentrations of targeted genes in the effluent across all stages (copies/mL of  
308 effluent) in the (a) Cell-associated fraction and (b) cell-free fraction.

309 **Table S10** Relative abundance of ARGs and MGEs normalized by copies of *rpoB* in the  
310 influent and the effluent samples across all stages (copies/ copies of *rpoB*): a. influent; b.  
311 effluent.

312 **Table S11** Correlation coefficients for target genes in the effluent cell-associated fraction  
313 across all stages, a. r values; b. corresponding p values.

314 **Table S12** Correlation coefficients for target genes in the effluent cell-free fraction across  
315 all stages, a. r values; b. corresponding p-values.

**Table S1** Solids contents in the influent, effluent and the mixed liquor (n=7).

|                         | Baseline     | Stage1      | Stage2     | Stage3       | Stage4      |
|-------------------------|--------------|-------------|------------|--------------|-------------|
| Influent TSS (mg/L)     | 138.0 ± 2.40 | 5490 ± 104  | 8350 ± 164 | 13100 ± 262  | 20500 ± 405 |
| Influent VSS (mg/L)     | 116.0 ± 2.33 | 4360 ± 85.1 | 6620 ± 134 | 10400 ± 208  | 16200 ± 322 |
| Mixed liquor TSS (mg/L) | 7550 ± 139   | 8240 ± 164  | 8690 ± 174 | 10600 ± 2110 | 12800 ± 256 |
| Mixed liquor VSS (mg/L) | 5510 ± 107   | 5930 ± 116  | 6430 ± 128 | 8150 ± 162   | 9720 ± 193  |

**Table S2** Volatile fatty acids (VFAs) concentrations in effluent across all operational stages (n=4). The fraction of VFAs in effluent COD is calculated from the theoretical COD of VFAs normalized by the total effluent COD.

| Operational Stage | Concentration of VFAs (mg/L) |             |             |          |          | The fraction of VFAs in effluent COD (%) |
|-------------------|------------------------------|-------------|-------------|----------|----------|------------------------------------------|
|                   | Formate                      | Acetate     | Propionate  | Butyrate | Valerate |                                          |
| Baseline          | 2.21 ± 0.18                  | 2.72 ± 0.16 | -           | -        | -        | 6.90                                     |
| Stage1            | 5.32 ± 0.11                  | 3.02 ± 0.12 | 10.0 ± 0.16 | -        | -        | 30.0                                     |
| Stage2            | 9.06 ± 0.20                  | 2.06 ± 0.05 | 32.7 ± 0.64 | -        | -        | 61.8                                     |
| Stage3            | 6.29 ± 0.39                  | -           | 44.7 ± 0.86 | -        | -        | 49.3                                     |
| Stage4            | 8.29 ± 0.17                  | -           | 57.1 ± 1.21 | -        | -        | 37.2                                     |

**Table S3** Internal standards for caARG and cfARG.

| Internal Standards         | Forward primer (5' to 3') | Reverse primer (5' to 3') | Annealing temperature (°C) |
|----------------------------|---------------------------|---------------------------|----------------------------|
| caARG,<br><i>MHT</i>       | CCCAGATCCCACGGAATCACTT    | ATTGCAAAACCATTCGGACCCC    | 61                         |
| cfARG,<br><i>ARHGAP11B</i> | GCCGAGCGGAGTTCAAATTTGA    | CGGACACCCTTCACCTTAAT      | 60                         |



**Table S4** The primer sequences and qPCR conditions for all target genes.

| <b>Target genes</b> | <b>Forward primer (5' to 3')</b> | <b>Reverse primer (5' to 3')</b> | <b>Annealing temperature (°C)</b> | <b>Reference</b>        |
|---------------------|----------------------------------|----------------------------------|-----------------------------------|-------------------------|
| <i>tetW</i>         | GAGAGCCTGCTATATGCCAGC            | GGGCGTATCCACAATGTAAAC            | 60                                | (Aminov et al., 2001)   |
| <i>tetO</i>         | ACGGARAGTTTATTGTATAACC           | TGGCGTATCTATAATGTTGAC            | 50.3                              | (Aminov et al., 2001)   |
| <i>ampC</i>         | CCTCTTGCTCCACATTTGCT             | ACAACGTTTGCTGTGTGACG             | 57.5                              | (Yang et al., 2012)     |
| <i>sul1</i>         | CGCACCGGAAACATCGCTGCAC           | TGAAGTTCCGCCGCAAGGCTCG           | 69.5                              | (Pei et al., 2006)      |
| <i>sul2</i>         | TCCGGTGGAGGCCGGTATCTGG           | CGGGAATGCCATCTGCCTTGAG           | 65.5                              | (Pei et al., 2006)      |
| <i>ermB</i>         | GATACCGTTTACGAAATTGG             | GAATCGAGACTTGAGTGTGC             | 53.5                              | (Chen et al., 2007)     |
| <i>ermF</i>         | CGACACAGCTTTGGTTGAAC             | GGACCTACCTCATAGACAAG             | 57.5                              | Chen et al., 2007)      |
| <i>blaOXA1</i>      | TATCTACAGCAGCGCCAGTG             | CGCATCAAATGCCATAAGTG             | 60                                | (Yang et al., 2012)     |
| <i>int11</i>        | CTGGATTTCGATCACGGCACG            | ACATGCGTGTAATCATCGTCG            | 60                                | (Hardwick et al., 2008) |
| <i>tp614</i>        | GGAAATCAACGGCATCCAGTT            | CATCCATGCGCTTTTGTCTCT            | 60                                | (Zhu et al., 2013a)     |
| <i>blaNDM1</i>      | CGCCATCCCTGACGATCAAA             | CTGAGCACCGCATTAGCCG              | 57                                | (Luo et al., 2013)      |
| <i>rpoB</i>         | AACATCGGTTTGATCAAC               | CGTTGCATGTTGGTACCCAT             | 51                                | (Dahllof et al., 2000)  |

**Table S5** Primer efficiencies and limit of detection of each assay.

| Gene            | Efficiency (%) | R <sup>2</sup> | Detection limit for<br>influent samples<br>(copies/mL) | Detection limit for<br>effluent samples<br>(copies/mL) |
|-----------------|----------------|----------------|--------------------------------------------------------|--------------------------------------------------------|
| <i>rpoB</i>     | 103            | 0.998          | 231                                                    | 20                                                     |
| <i>sul1</i>     | 97.2           | 0.999          | 237                                                    | 20                                                     |
| <i>sul2</i>     | 90.2           | 0.998          | 3070                                                   | 263                                                    |
| <i>blaOXA-1</i> | 107            | 0.996          | 35                                                     | 3                                                      |
| <i>ermF</i>     | 108            | 0.993          | 275                                                    | 24                                                     |
| <i>tet(W)</i>   | 112            | 0.991          | 102                                                    | 9                                                      |
| <i>ampC</i>     | 114            | 0.998          | 43                                                     | 4                                                      |
| <i>ermB</i>     | 103            | 0.998          | 19                                                     | 2                                                      |
| <i>tet(O)</i>   | 98.4           | 0.997          | 374                                                    | 32                                                     |
| <i>blaNDM-1</i> | 94.1           | 0.997          | 282                                                    | 24                                                     |
| <i>intI1</i>    | 97.8           | 0.998          | 209                                                    | 18                                                     |
| <i>tp614</i>    | 95.5           | 0.998          | 33                                                     | 3                                                      |
| <i>iDNA</i>     |                |                |                                                        |                                                        |
| <i>standard</i> | 88.9           | 0.997          | 175                                                    | 15                                                     |
| <i>eDNA</i>     |                |                |                                                        |                                                        |
| <i>standard</i> | 99.7           | 0.999          | 203                                                    | 17                                                     |

**Table S6** caDNA and cfDNA recoveries of all stages.

| Sample              |                 | Recovery Efficiency (%) |
|---------------------|-----------------|-------------------------|
| Baseline – influent | Cell-associated | 66.00±25.7              |
| Baseline – effluent | Cell-associated | 49.8±41.7               |
|                     | Cell-free       | 33.7±7.69               |
| Stage1 - influent   | Cell-associated | 38.3±10.3               |
| Stage1 - effluent   | Cell-associated | 78.2±10.2               |
|                     | Cell-free       | 31.5±26.2               |
| Stage2 - influent   | Cell-associated | 56.3±21.9               |
| Stage2 - effluent   | Cell-associated | 34.4±1.28               |
|                     | Cell-free       | 30.7±12.1               |
| Stage3 - influent   | Cell-associated | 34.0±12.6               |
| Stage3 - effluent   | Cell-associated | 50.9±20.1               |
|                     | Cell-free       | 30.0±7.70               |
| Stage 4 - influent  | Cell-associated | 77.9±39.0               |
| Stage 4 - influent  | Cell-associated | 61.1±27.9               |
|                     | Cell-free       | 34.4±6.67               |

**Table S7** LRVs of target genes in each operational stage. Influent and effluent concentrations of each gene were significantly different from one another within each stage (t-test,  $p < 0.001$ ).

| Gene            | Baseline | Stage1 | Stage2 | Stage3 | Stage4 |
|-----------------|----------|--------|--------|--------|--------|
| <i>intI1</i>    | 0.21     | 1.48   | 2.20   | 2.43   | 4.77   |
| <i>sul1</i>     | 1.44     | 1.88   | 3.00   | 3.05   | 3.54   |
| <i>sul2</i>     | 1.28     | 1.01   | 2.65   | 3.13   | 3.07   |
| <i>ampC</i>     | -0.36    | 0.20   | 1.36   | 2.06   | 2.64   |
| <i>blaOXA-1</i> | 2.83     | 2.22   | 6.08   | 3.17   | 2.21   |
| <i>ermB</i>     | 3.40     | 3.35   | 3.74   | 4.21   | 4.04   |
| <i>ermF</i>     | 3.49     | 2.20   | 3.33   | 3.37   | 2.44   |
| <i>tet(O)</i>   | 2.41     | 2.78   | 3.98   | 3.91   | 3.21   |
| <i>tet(W)</i>   | 4.63     | 4.14   | 2.52   | 4.22   | 4.52   |
| <i>tp614</i>    | 4.18     | 3.52   | 4.17   | 4.40   | 3.61   |
| <i>blaNDM1</i>  | -        | -2.18  | 1.11   | 1.79   | 0.88   |

**Table S8** Concentrations of target genes in the influent across all stages (copies/mL of influent).

| Target gene    | Baseline              | Stage 1               | Stage 2               | Stage 3               | Stage 4               |
|----------------|-----------------------|-----------------------|-----------------------|-----------------------|-----------------------|
| <i>rpoB</i>    | 1.32E+05 ± (4.87E+04) | 7.95E+05 ± (3.44E+05) | 2.79E+05 ± (8.41E+04) | 3.83E+06 ± (1.59E+06) | 3.22E+06 ± (2.26E+06) |
| <i>intI1</i>   | 1.47E+07 ± (6.60E+06) | 1.08E+08 ± (1.31E+07) | 2.53E+08 ± (1.53E+08) | 1.15E+08 ± (7.74E+07) | 8.38E+07 ± (5.39E+07) |
| <i>sul1</i>    | 8.23E+07 ± (1.16E+05) | 1.42E+08 ± (4.22E+06) | 6.62E+08 ± (4.94E+08) | 4.85E+08 ± (1.88E+08) | 3.04E+08 ± (1.40E+08) |
| <i>sul2</i>    | 2.23E+06 ± (4.01E+04) | 2.93E+06 ± (5.31E+05) | 5.04E+07 ± (6.01E+06) | 1.05E+08 ± (8.15E+07) | 4.46E+07 ± (2.42E+07) |
| <i>ampC</i>    | 1.18E+05 ± (9.05E+02) | 2.41E+06 ± (2.83E+05) | 5.12E+06 ± (2.23E+06) | 2.46E+07 ± (2.02E+07) | 2.01E+06 ± (1.70E+06) |
| <i>blaOXA1</i> | 2.59E+04 ± (1.19E+03) | 1.11E+04 ± (1.86E+3)  | 4.71E+06 ± (9.30E+04) | 5.44E+06 ± (9.81E+05) | 1.28E+06 ± (7.86E+05) |
| <i>ermB</i>    | 1.34E+06 ± (2.30E+04) | 4.62E+06 ± (9.78E+04) | 4.71E+06 ± (2.13E+06) | 1.25E+06 ± (3.68E+06) | 5.88E+05 ± (3.59E+05) |
| <i>ermF</i>    | 3.07E+06 ± (2.25E+3)  | 1.32E+06 ± (2.09E+5)  | 9.91E+06 ± (4.20E+06) | 9.07E+06 ± (1.51E+07) | 1.73E+06 ± (1.10E+06) |
| <i>tetO</i>    | 5.66E+06 ± (1.59E+02) | 2.35E+06 ± (1.61E+06) | 3.34E+07 ± (1.66E+07) | 1.87E+07 ± (3.79E+08) | 1.26E+07 ± (9.36E+06) |
| <i>tetW</i>    | 5.71E+06 ± (2.50E+03) | 9.94E+06 ± (2.84E+05) | 2.87E+06 ± (1.96E+06) | 4.61E+08 ± (3.55E+05) | 8.44E+06 ± (6.05E+06) |
| <i>tp614</i>   | 8.42E+06 ± (1.18E+06) | 7.30E+05 ± (4.91E+05) | 1.23E+07 ± (7.01E+06) | 2.05E+07 ± (1.74E+07) | 7.72E+06 ± (6.72E+06) |
| <i>blaNDM1</i> | ULC*                  | 4.43E+02 ± (8.17E+00) | 1.01E+05 ± (3.92E+04) | 1.38E+06 ± (1.17E+06) | 5.52E+05 ± (2.57E+05) |

**Table S9** Concentrations of targeted genes in the effluent across all stages (copies/mL of effluent) in the (a) Cell-associated fraction and (b) cell-free fraction.

Table S9. a

| <b>Target gene</b> | <b>Baseline</b>          | <b>Stage 1</b>           | <b>Stage 2</b>           | <b>Stage 3</b>           | <b>Stage 4</b>           |
|--------------------|--------------------------|--------------------------|--------------------------|--------------------------|--------------------------|
| <i>rpoB</i>        | 6.36E+03 ±<br>(2.83E+03) | 1.66E+04 ±<br>(1.96E+04) | 1.04E+03±<br>(1.21E+03)  | 8.62E+03 ±<br>(5.41E+03) | 2.42E+02 ±<br>(9.52E+01) |
| <i>intI1</i>       | 9.07E+06 ±<br>(1.43E+07) | 3.57E+06 ±<br>(4.11E+06) | 6.67E+05 ±<br>(6.75E+05) | 4.51E+05 ±<br>(7.28E+05) | 6.43E+02 ±<br>(5.05E+07) |
| <i>sul1</i>        | 2.50E+06 ±<br>(2.70E+06) | 7.31E+05 ±<br>(4.06E+05) | 6.08E+05 ±<br>(7.64E+05) | 3.18E+05 ±<br>(1.82E+05) | 1.04E+03 ±<br>(1.42E+08) |
| <i>sul2</i>        | 1.13E+05 ±<br>(1.68E+05) | 2.76E+05 ±<br>(4.63E+05) | 7.08E+04 ±<br>(9.50E+04) | 7.40E+04 ±<br>(3.33E+04) | 4.24E+03 ±<br>(2.33E+07) |
| <i>ampC</i>        | 2.74E+05 ±<br>(3.52E+05) | 1.52E+06 ±<br>(1.77E+06) | 2.22E+05 ±<br>(3.07E+05) | 2.14E+05 ±<br>(1.15E+05) | 3.45E+03 ±<br>(1.56E+06) |
| <i>blaOXA1</i>     | 3.65E+01 ±<br>(4.34E+01) | 6.49E+01 ±<br>(9.21E+01) | 1.97E+00 ±<br>(2.91E+00) | 3.63E+03 ±<br>(1.11E+01) | 5.57E+01 ±<br>(7.40E+05) |
| <i>ermB</i>        | 5.18E+02 ±<br>(7.19E+02) | 1.86E+03 ±<br>(1.98E+03) | 2.55E+02 ±<br>(1.68E+02) | 2.90E+01 ±<br>(3.30E+03) | 1.49E+01 ±<br>(3.38E+05) |
| <i>ermF</i>        | 9.91E+02 ±<br>(8.81E+02) | 8.13E+03 ±<br>(3.07E+03) | 4.59E+03 ±<br>(4.87E+03) | 3.87E+03 ±<br>(1.24E+03) | 2.46E+01 ±<br>(1.03E+06) |
| <i>tetO</i>        | 2.15E+04 ±<br>(2.36E+04) | 2.89E+03 ±<br>(5.51E+03) | 1.99E+03 ±<br>(1.17E+03) | 1.57E+03 ±<br>(3.81E+03) | 3.81E+02 ±<br>(2.63E+06) |
| <i>tetW</i>        | 1.07E+02 ±<br>(7.93E+01) | 7.01E+02 ±<br>(1.31E+03) | 8.51E+03 ±<br>(1.53E+04) | 1.12E+04 ±<br>(7.25E+01) | 2.24E+01 ±<br>(5.59E+06) |
| <i>tp614</i>       | 5.39E+02 ±<br>(9.35E+02) | 1.20E+02 ±<br>(1.15E+02) | 6.55E+02 ±<br>(4.23E+02) | 4.17E+02 ±<br>(2.54E+02) | 2.14E+02 ±<br>(6.15E+06) |
| <i>blaNDM1</i>     | ULC*                     | 6.61E+04 ±<br>(9.66E+04) | 7.15E+03 ±<br>(8.92E+03) | 2.16E+04 ±<br>(1.19E+04) | 1.42E+04 ±<br>(2.59E+05) |

Table S9. b

| Target gene    | Baseline                  | Stage1                   | Stage2                   | Stage3                   | Stage4                   |
|----------------|---------------------------|--------------------------|--------------------------|--------------------------|--------------------------|
| <i>int11</i>   | 5.91E+02 ±<br>(7.07E+00)  | 4.58E+03 ±<br>(3.96E+03) | 5.79E+03 ±<br>(1.28E+01) | 6.50E+01 ±<br>(1.65E+03) | 7.90E+02 ±<br>(1.16E+06) |
| <i>sul1</i>    | 4.98E+05 ±<br>(8.50E+02)  | 1.15E+06 ±<br>(1.97E+06) | 4.88E+04 ±<br>(2.04E+04) | 1.15E+05 ±<br>(1.25E+05) | 8.62E+04 ±<br>(7.54E+04) |
| <i>sul2</i>    | 3.08E+03 ±<br>(5.86E+05)  | 7.21E+03 ±<br>(7.80E+03) | 4.19E+04 ±<br>(4.11E+03) | 3.99E+03 ±<br>(2.53E+04) | 3.32E+04 ±<br>(5.55E+05) |
| <i>ampC</i>    | 2.46E+01 ±<br>(5.96E+03)  | 9.27E+03 ±<br>(7.97E+03) | 2.25E+03 ±<br>(2.09E+03) | 5.35E+02 ±<br>(3.48E+02) | 1.12E+03 ±<br>(9.24E+05) |
| <i>blaOXA1</i> | 1.45E+00 ±<br>(2.03E+01)  | 1.75E+00 ±<br>(2.03E+00) | ULC*                     | 2.90E+01 ±<br>(3.50E+02) | 7.80E+03 ±<br>(9.70E+03) |
| <i>ermB</i>    | 1.55E+01 ±<br>(1.29E+01)  | 1.98E+02 ±<br>(1.90E+02) | 6.00E+02 ±<br>(1.78E+01) | 4.74E+01 ±<br>(3.54E+01) | 3.82E+01 ±<br>(1.33E+01) |
| <i>ermF</i>    | 1.45E+00 ± (8.69E-<br>01) | 1.88E+02 ±<br>(2.41E+02) | 1.01E+02 ±<br>(8.01E+01) | 1.10E+01 ±<br>(5.55E+02) | 6.29E+03 ±<br>(2.53E+03) |
| <i>tetO</i>    | 3.83E+02 ±<br>(4.70E+02)  | 1.02E+03 ±<br>(1.41E+03) | 1.51E+03 ±<br>(5.68E+01) | 7.40E+02 ±<br>(8.89E+03) | 7.33E+03 ±<br>(2.60E+03) |
| <i>tetW</i>    | 2.55E+01 ±<br>(2.30E+01)  | 1.41E+01 ±<br>(1.38E+01) | 8.85E+01 ±<br>(6.01E+01) | 1.63E+04 ±<br>(1.12E+01) | 2.31E+02 ±<br>(1.65E+02) |
| <i>tp614</i>   | 2.08E+01 ±<br>(2.88E+01)  | 9.81E+01 ±<br>(2.53E+02) | 1.81E+02 ±<br>(1.56E+02) | 4.05E+02 ±<br>(6.01E+10) | 1.66E+03 ±<br>(2.82E+03) |
| <i>blaNDM1</i> | ULC*                      | 2.92E+02 ±<br>(4.13E+05) | 6.43E+02 ±<br>(5.82E+02) | 7.48E+02 ±<br>(3.30E+02) | 5.85E+04 ±<br>(4.28E+04) |

**Table. S10** Relative abundance of ARGs and MGEs normalized by copies of *rpoB* in the influent and the effluent samples across all stages (copies/ copies of *rpoB*): a. influent; b. effluent.

Table S10. a

| Target gene    | Baseline | Stage1   | Stage2   | Stage3   | Stage4   |
|----------------|----------|----------|----------|----------|----------|
| <i>int11</i>   | 1.11E+01 | 1.36E+01 | 9.08E+01 | 3.00E+00 | 2.60E+00 |
| <i>sul1</i>    | 6.22E+01 | 1.79E+01 | 2.61E+00 | 4.23E+00 | 3.63E+00 |
| <i>sul2</i>    | 1.68E+00 | 3.69E-01 | 7.62E-02 | 2.16E-01 | 1.47E-01 |
| <i>ampC</i>    | 8.94E-02 | 3.03E-01 | 1.02E-01 | 2.35E-01 | 4.51E-02 |
| <i>blaOXA1</i> | 1.95E-02 | 1.40E-03 | 9.20E-01 | 2.21E-01 | 6.34E-01 |
| <i>ermB</i>    | 1.01E+00 | 5.81E-01 | 1.00E+00 | 2.30E-01 | 4.61E-01 |
| <i>ermF</i>    | 2.32E+00 | 1.66E-01 | 2.10E+00 | 7.24E+00 | 2.95E+00 |
| <i>tetO</i>    | 4.28E+00 | 2.96E-01 | 3.37E+00 | 2.06E+00 | 7.28E+00 |
| <i>tetW</i>    | 4.31E+00 | 1.25E+00 | 8.62E-02 | 2.46E+01 | 6.68E-01 |
| <i>tp614</i>   | 6.37E+00 | 9.18E-02 | 4.29E+00 | 4.45E-02 | 9.14E-01 |
| <i>blaNDM1</i> | 0.00E+00 | 5.58E-05 | 8.19E-03 | 6.75E-02 | 7.15E-02 |

Table S10. b

| Target gene    | Baseline | Stage1   | Stage2   | Stage3   | Stage4   |
|----------------|----------|----------|----------|----------|----------|
| <i>intI1</i>   | 1.43E+02 | 2.15E+01 | 6.40E+01 | 5.23E+00 | 2.65E-01 |
| <i>sul1</i>    | 3.94E+01 | 4.40E+00 | 5.83E+01 | 3.69E+00 | 4.30E-01 |
| <i>sul2</i>    | 1.78E+00 | 1.66E+00 | 6.79E+00 | 8.59E-01 | 1.75E+00 |
| <i>ampC</i>    | 4.31E+00 | 9.17E+00 | 2.13E+01 | 2.48E+00 | 1.42E+00 |
| <i>blaOXA1</i> | 5.74E-04 | 3.91E-04 | 1.89E-04 | 4.22E-02 | 2.30E-02 |
| <i>ermB</i>    | 8.15E-03 | 1.12E-02 | 2.44E-02 | 3.37E-04 | 6.13E-03 |
| <i>ermF</i>    | 1.56E-02 | 4.89E-02 | 4.40E-01 | 4.50E-02 | 1.01E-02 |
| <i>tetO</i>    | 3.37E-01 | 1.74E-02 | 1.91E-01 | 1.82E-02 | 1.57E-01 |
| <i>tetW</i>    | 1.69E-03 | 4.22E-03 | 8.16E-01 | 1.30E-01 | 9.23E-03 |
| <i>tp614</i>   | 8.47E-03 | 7.22E-04 | 6.29E-02 | 4.84E-03 | 8.82E-02 |
| <i>blaNDM1</i> | 0.00E+00 | 3.98E-01 | 6.86E-01 | 2.51E-01 | 5.87E+00 |

**Table S11** Correlation coefficients for target genes in the effluent cell-associated fraction across all stages, a. r values; b. corresponding p values.

Table S11. a

|                | <i>rpoB</i> | <i>intI1</i> | <i>sul1</i> | <i>sul2</i> | <i>ampC</i> | <i>blaOXA1</i> | <i>ermB</i> | <i>ermF</i> | <i>tetO</i> | <i>tetW</i> | <i>tp614</i> | <i>blaNDM1</i> |
|----------------|-------------|--------------|-------------|-------------|-------------|----------------|-------------|-------------|-------------|-------------|--------------|----------------|
| <i>rpoB</i>    | 1.00        | 0.28         | 0.09        | <b>0.85</b> | <b>0.91</b> | -0.23          | -0.09       | 0.06        | -0.04       | -0.01       | -0.14        | <b>0.93</b>    |
| <i>intI1</i>   | -           | 1.00         | <b>0.97</b> | 0.39        | 0.21        | -0.34          | 0.35        | -0.11       | <b>0.95</b> | -0.52       | 0.17         | -0.12          |
| <i>sul1</i>    | -           | -            | 1.00        | 0.26        | 0.06        | -0.30          | 0.20        | -0.17       | <b>0.98</b> | -0.36       | 0.40         | -0.31          |
| <i>sul2</i>    | -           | -            | -           | 1.00        | <b>0.97</b> | -0.18          | <b>0.97</b> | <b>0.82</b> | 0.12        | -0.26       | -0.41        | <b>0.82</b>    |
| <i>ampC</i>    | -           | -            | -           | -           | 1.00        | -0.21          | <b>0.98</b> | <b>0.85</b> | -0.07       | -0.29       | -0.56        | <b>0.91</b>    |
| <i>blaOXA1</i> | -           | -            | -           | -           | -           | 1.00           | -0.36       | 0.06        | -0.26       | <b>0.73</b> | 0.05         | 0.00           |
| <i>ermB</i>    | -           | -            | -           | -           | -           | -              | 1.00        | <b>0.76</b> | 0.07        | -0.43       | -0.52        | <b>0.84</b>    |
| <i>ermF</i>    | -           | -            | -           | -           | -           | -              | -           | 1.00        | -0.35       | 0.23        | -0.25        | <b>0.81</b>    |
| <i>tetO</i>    | -           | -            | -           | -           | -           | -              | -           | -           | 1.00        | -0.41       | 0.37         | -0.40          |
| <i>tetW</i>    | -           | -            | -           | -           | -           | -              | -           | -           | -           | 1.00        | 0.51         | -0.18          |
| <i>tp614</i>   | -           | -            | -           | -           | -           | -              | -           | -           | -           | -           | 1.00         | -0.77          |
| <i>blaNDM1</i> | -           | -            | -           | -           | -           | -              | -           | -           | -           | -           | -            | 1.00           |

Table S11. b



|                | <i>rpoB</i> | <i>intI1</i> | <i>sul1</i> | <i>sul2</i> | <i>ampC</i> | <i>blaOXA1</i> | <i>ermB</i> | <i>ermF</i> | <i>tetO</i> | <i>tetW</i> | <i>tp614</i> | <i>blaNDM1</i> |
|----------------|-------------|--------------|-------------|-------------|-------------|----------------|-------------|-------------|-------------|-------------|--------------|----------------|
| <i>rpoB</i>    | 0.00        | 0.15         | 0.65        | 0.00        | 0.00        | 0.58           | 0.64        | 0.76        | 0.83        | 0.01        | 0.48         | 0.00           |
| <i>intI1</i>   | -           | 0.00         | 0.00        | 0.23        | 0.38        | 0.63           | 0.87        | 0.95        | 0.00        | 0.01        | 0.97         | 0.51           |
| <i>sul1</i>    | -           | -            | -           | 0.52        | 0.01        | 0.77           | 0.83        | 0.94        | 0.00        | 0.00        | 0.82         | 0.95           |
| <i>sul2</i>    | -           | -            | -           | -           | 0.00        | 0.74           | 0.00        | 0.01        | 0.61        | 0.91        | 0.34         | 0.00           |
| <i>ampC</i>    | -           | -            | -           | -           | -           | -              | 0.00        | 0.00        | 0.57        | 0.98        | 0.96         | 0.00           |
| <i>blaOXA1</i> | -           | -            | -           | -           | -           | -              | 0.55        | 0.92        | 0.68        | 0.00        | 0.93         | 0.99           |
| <i>ermB</i>    | -           | -            | -           | -           | -           | -              | -           | 0.00        | 0.97        | 0.75        | 0.25         | 0.00           |
| <i>ermF</i>    | -           | -            | -           | -           | -           | -              | -           | -           | 0.28        | 0.56        | 0.74         | 0.00           |
| <i>tetO</i>    | -           | -            | -           | -           | -           | -              | -           | -           | -           | 0.53        | 0.86         | 0.39           |
| <i>tetW</i>    | -           | -            | -           | -           | -           | -              | -           | -           | -           | -           | 0.00         | 0.99           |
| <i>tp614</i>   | -           | -            | -           | -           | -           | -              | -           | -           | -           | -           | -            | 0.00           |
| <i>blaNDM1</i> | -           | -            | -           | -           | -           | -              | -           | -           | -           | -           | -            | 0.00           |

**Table S12** Correlation coefficients for target genes in the effluent cell-free fraction across all stages, a. r values; b. corresponding p-values.

Table S12. a

|                | <i>rpoB</i> | <i>intI1</i> | <i>sul1</i> | <i>sul2</i> | <i>ampC</i> | <i>blaOXA1</i> | <i>ermB</i> | <i>ermF</i> | <i>tetO</i> | <i>tetW</i> | <i>tp614</i> | <i>blaNDM1</i> |
|----------------|-------------|--------------|-------------|-------------|-------------|----------------|-------------|-------------|-------------|-------------|--------------|----------------|
| <i>rpoB</i>    | 1.00        | -0.20        | 0.09        | -0.20       | -0.21       | -0.21          | 0.47        | -0.24       | -0.17       | <b>0.77</b> | -0.09        | 0.08           |
| <i>intI1</i>   | -           | 1.00         | 0.29        | <b>0.58</b> | <b>0.63</b> | -0.34          | <b>0.89</b> | -0.31       | -0.21       | -0.49       | -0.38        | -0.33          |
| <i>sul1</i>    | -           | -            | 1.00        | -0.55       | 0.83        | -0.47          | -0.15       | -0.33       | -0.37       | -0.32       | -0.45        | -0.36          |
| <i>sul2</i>    | -           | -            | -           | 1.00        | -0.12       | 0.47           | 0.67        | 0.47        | <b>0.57</b> | -0.42       | 0.46         | 0.47           |
| <i>ampC</i>    | -           | -            | -           | -           | 1.00        | -0.22          | 0.24        | -0.20       | -0.17       | -0.31       | -0.28        | -0.22          |
| <i>blaOXA1</i> | -           | -            | -           | -           | -           | 1.00           | -0.32       | <b>0.99</b> | <b>0.99</b> | -0.23       | <b>0.98</b>  | 0.99           |
| <i>ermB</i>    | -           | -            | -           | -           | -           | -              | 1.00        | -0.31       | -0.19       | -0.30       | -0.32        | -0.32          |
| <i>ermF</i>    | -           | -            | -           | -           | -           | -              | -           | 1.00        | <b>0.99</b> | -0.25       | <b>0.97</b>  | <b>0.99</b>    |
| <i>tetO</i>    | -           | -            | -           | -           | -           | -              | -           | -           | 1.00        | -0.26       | <b>0.97</b>  | <b>0.99</b>    |
| <i>tetW</i>    | -           | -            | -           | -           | -           | -              | -           | -           | -           | 1.00        | -0.04        | -0.23          |
| <i>tp614</i>   | -           | -            | -           | -           | -           | -              | -           | -           | -           | -           | 1.00         | <b>0.98</b>    |
| <i>blaNDM1</i> | -           | -            | -           | -           | -           | -              | -           | -           | -           | -           | -            | 1.00           |

Table S12. b

| <i>rpoB</i> | <i>intI1</i> | <i>sul1</i> | <i>sul2</i> | <i>ampC</i> | <i>blaOXA1</i> | <i>ermB</i> | <i>ermF</i> | <i>tetO</i> | <i>tetW</i> | <i>tp614</i> | <i>blaNDM1</i> |
|-------------|--------------|-------------|-------------|-------------|----------------|-------------|-------------|-------------|-------------|--------------|----------------|
|-------------|--------------|-------------|-------------|-------------|----------------|-------------|-------------|-------------|-------------|--------------|----------------|

|                |      |      |      |      |      |      |      |      |      |      |      |      |
|----------------|------|------|------|------|------|------|------|------|------|------|------|------|
| <i>rpoB</i>    | 0.00 | 0.35 | 0.68 | 0.37 | 0.34 | 0.54 | 0.02 | 0.27 | 0.44 | 0.00 | 0.69 | 0.72 |
| <i>intI1</i>   | -    | 0.00 | 0.77 | 0.00 | 0.00 | 0.58 | 0.33 | 0.00 | 0.00 | 0.40 | 0.00 | 0.49 |
| <i>sul1</i>    | -    | -    | 0.00 | 0.73 | 0.75 | 0.56 | 0.44 | 0.70 | 0.52 | 0.54 | 0.80 | 0.00 |
| <i>sul2</i>    | -    | -    | -    | 0.00 | 0.00 | 0.43 | 0.36 | 0.00 | 0.00 | 0.49 | 0.00 | 0.49 |
| <i>ampC</i>    | -    | -    | -    | -    | 0.00 | 0.72 | 0.37 | 0.00 | 0.01 | 0.43 | 0.00 | 0.48 |
| <i>blaOXA1</i> | -    | -    | -    | -    | -    | 0.00 | 0.55 | 0.00 | 0.00 | 0.16 | 0.00 | 0.99 |
| <i>ermB</i>    | -    | -    | -    | -    | -    | -    | 0.00 | 0.27 | 0.51 | 0.05 | 0.87 | 0.39 |
| <i>ermF</i>    | -    | -    | -    | -    | -    | -    | -    | 0.00 | 0.00 | 0.33 | 0.00 | 0.00 |
| <i>tetO</i>    | -    | -    | -    | -    | -    | -    | -    | -    | 0.00 | 0.62 | 0.00 | 0.00 |
| <i>tetW</i>    | -    | -    | -    | -    | -    | -    | -    | -    | -    | 0.00 | 0.89 | 0.50 |
| <i>tp614</i>   | -    | -    | -    | -    | -    | -    | -    | -    | -    | -    | 0.00 | 0.00 |
| <i>blaNDM1</i> | -    | -    | -    | -    | -    | -    | -    | -    | -    | -    | -    | 0.00 |

## Figure Captions

**Fig. S1.** AnMBR performance throughout all stages. Influent COD, effluent COD, COD removal and methane production are shown. Error bars represent standard deviations of all biological replicates within each stage (n>7 for COD data; n = 3 for methane production of each stage).

**Fig. S2** Percent removal contributed by the removal of individual target gene across all operational stages (n=5).

**Fig. S3.** Concentration of target genes (ARGs and MGEs, copies/mL) in the influent across operational stages (n=5).

**Fig. S4** Effluent target gene composition: relative abundance (%) of cell-free target genes and cell-associated target genes (n=5).

Fig. S1

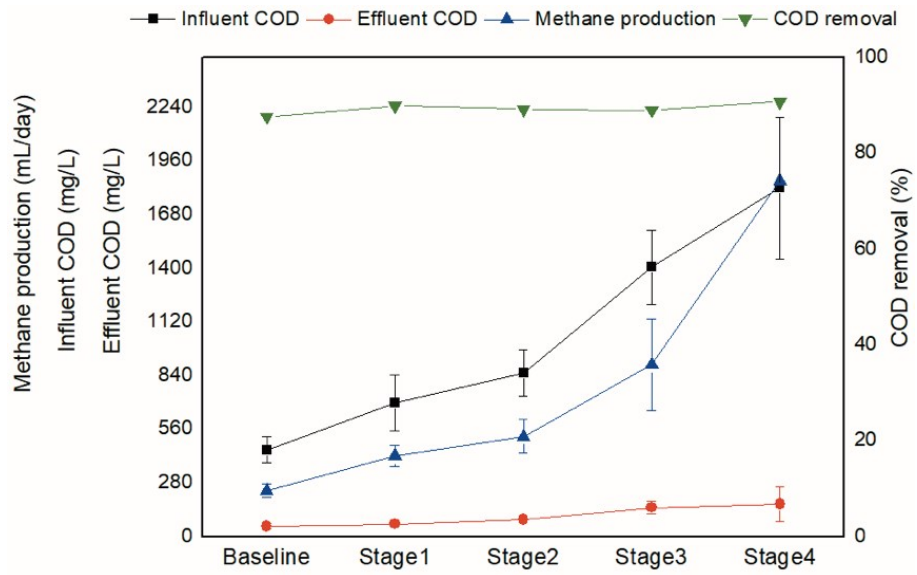

Fig. S2

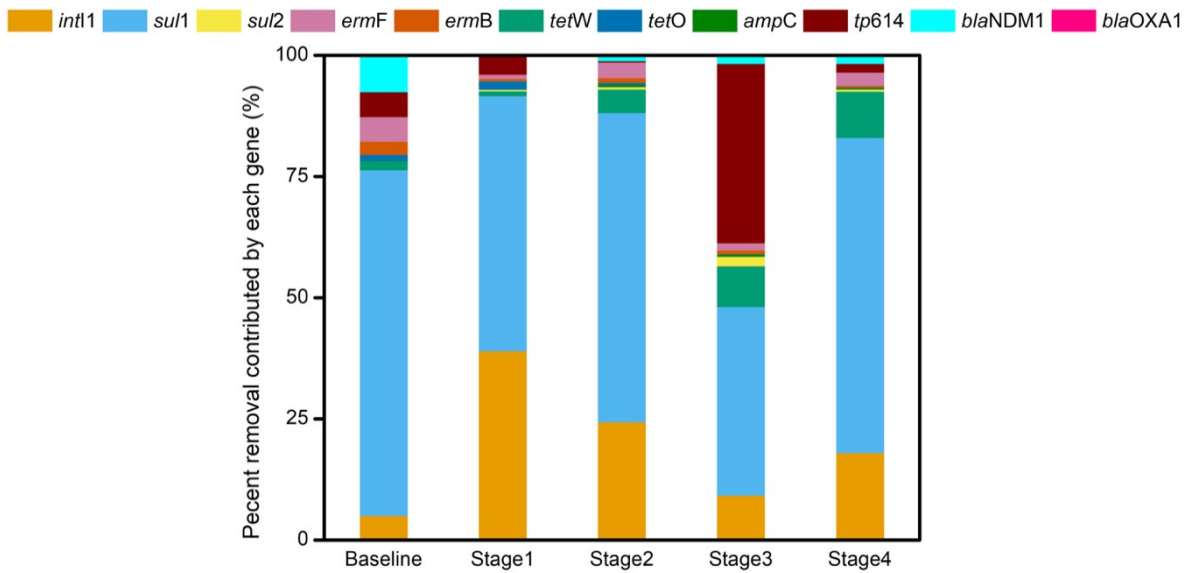

Fig. S3

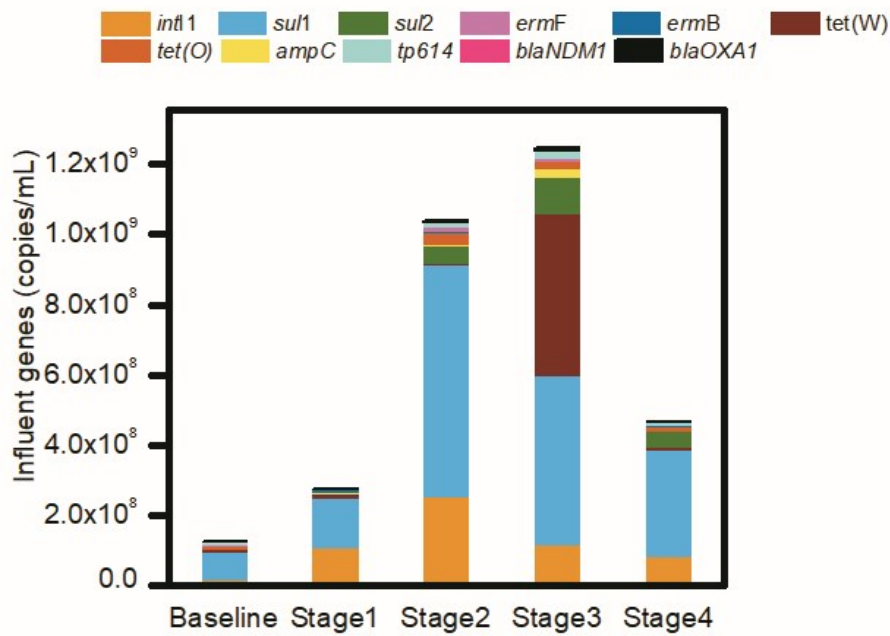

Fig. S4

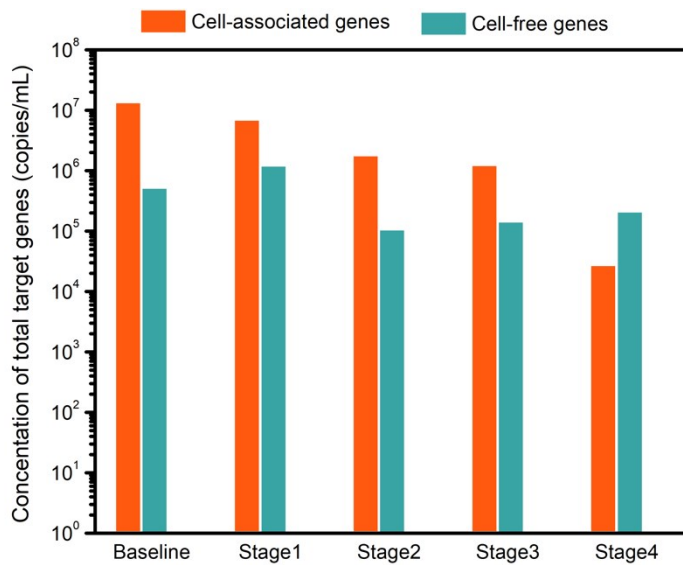

Supplement: d0ew00387e1.pdf [file d0ew00387e1.pdf]
